# Supplementary material for: Description of Halomicrobium halophilum sp. nov., a halophilic archaeon producing exopolysaccharides
Source: Research Square preprint supplement (doi:10.21203/rs.3.rs-8455562/v1), 2026-01-14
Supplement: Supplementary file 1 [file 5db1213507395a852cb7a99a.docx]

Supplementary files

**Description of *Halomicrobium halophilum* sp. nov., a halophilic archaeon producing exopolysaccharides**

**Bing-bing Liu1†, Shu-hong Xu1†, Jiang-hao Zhu1, Zi-qing Chen****1, Rong Shi2, Manik Prabhu Narsing Rao5*, Wen-Jun Li3,4***

**1Key Laboratory for Industrial Microbiology of Henan province, School of Biological and Chemical Engineering, Nanyang Institute of Technology, Nanyang 473000, PR China**

**2Hunan Institute for Drug Control, NMPA Key Laboratory for Pharmaceutical Excipients Engineering Technology Research, Changsha, 410001, PR China**

**3State Key Laboratory of Biocontrol, Guangdong Provincial Key Laboratory of Plant Stress Biology, School of Life Sciences, Sun Yat-Sen University, Guangzhou 510275, PR China**

**4State Key Laboratory of Ecological Safety and Sustainable Development in Arid Lands, Xinjiang Institute of Ecology and Geography, Chinese Academy of Sciences, Urumqi 830011, PR China**

**5Instituto de Ciencias Aplicadas, Facultad de Ingeniería, Universidad Autónoma de Chile, Centro de Investigación e Innovación, Avenida Del Valle 534, Huechuraba 8581151, Chile**

**†These authors contributed equally to this work**

***Authors for correspondence**

**Wen-Jun Li**

**E-mail: liwenjun3@mail.sysu.edu.cn**

**Manik Prabhu Narsing Rao**

**E-mail: deene.manik@gmail.com; manik.narsing@uautonoma.cl**

*Halosimplex rubrum* R27T *rrn*B (KF434757)

*Halosimplex pelagicum* R2T *rrn*B (KF434756)

*Halosimplex carlsbadense* 2-9-1T *rrn*C (HQ263563)

*Halosimplex carlsbadense* 2-9-1T *rrn*D (HQ263564)

*Halosimplex pelagicum* R2T *rrn*A (HM159602)

*Halosimplex carlsbadense* 2-9-1T *rrn*B (HQ263562)

*Halosimplex aquaticum* XZYJT29T *rrn*B (KX585242)

*Halosimplex salinum* YPL4T *rrn*A (NR_177327)

*Halosimplex aquaticum* XZYJT29T *rrn*A (KX585241)

*Halosimplex salinum* YPL4T *rrn*B (NR_177328)

*Halosimplex halophilum* TH32T (NR_177418)

*Halosimplex rubrum* R27T *rrn*A (HM159603)

*Halosimplex carlsbadense* 2-9-1T *rrn*A (HQ263561)

*Halomicrobium zhouii* TBN51T *rrn*C (HQ215547)

**YIM-93990T** *rrn*A (PV350694)

**YIM-93990T** *rrn*B (PV350695)

*Halomicrobium zhouii* TBN51T *rrn*A (HM063952)

*Halomicrobium zhouii* TBN51T *rrn*B (HQ215546)

*Halomicrobium mukohataei* JCM9738T *rrn*A (EF645690)

*Halomicrobium salinisoli* LT50T  *rrn*B (MZ798423)

*Halomicrobium mukohataei* JCM9738T *rrn*B (EF645691)

*Halomicrobium salinisoli* LT50T *rrn*C (MZ798429)

*Halomicrobium salinisoli* LT50T *rrn*A (KM496559)

*Halomicrobium urmianus* DC8T (KM596805)

*Methanospirillum hungatei* JF-1T (NR_074177)

99

100

99

91

58

90

97

75

94

99

100

97

93

54

81

82

99

0.02

Fig. S1. Neighbor-joining phylogenetic tree based on 16S rRNA gene sequence showing the relationships between strain YIM 93990T and closely related species. Bootstrap values (expressed as percentages of 1000 replications) greater than 50 % are shown at branch points. Bar, 0.02 substitutionsper nucleotide position. *Methanospirillum hungatei* JF-1T was used as an outgroup.

*Halosimplex aquaticum* XZYJT29T *rrn*A (KX585241)

*Halosimplex salinum* YPL4T *rrn*B (NR_177328)

*Halosimplex halophilum* TH32T (NR_177418)

*Halosimplex rubrum* R27T *rrn*A (HM159603)

*Halosimplex carlsbadense* 2-9-1T *rrn*A (HQ263561)

*Halosimplex carlsbadense* 2-9-1T *rrn*B (HQ263562)

*Halosimplex pelagicum* R2T *rrn*A (HM159602)

*Halosimplex carlsbadense* 2-9-1T *rrn*D (HQ263564)

*Halosimplex carlsbadense* 2-9-1T *rrn*C (HQ263563)

*Halosimplex rubrum* R27T *rrn*B (KF434757)

*Halosimplex pelagicum* R2T *rrn*B (KF434756)

*Halosimplex aquaticum* XZYJT29T *rrn*B (KX585242)

*Halosimplex salinum* YPL4T *rrn*A (NR_177327)

*Halomicrobium zhouii* TBN51T *rrn*C (HQ215547)

**YIM-93990T** *rrn*A (PV350694)

**YIM-93990T** *rrn*B (PV350695)

*Halomicrobium salinisoli* LT50T *rrn*C (MZ798429)

*Halomicrobium salinisoli* LT50T  *rrn*B (MZ798423)

*Halomicrobium salinisoli* LT50T *rrn*A (KM496559)

*Halomicrobium urmianus* DC8T (KM596805)

*Halomicrobium zhouii* TBN51T *rrn*A (HM063952)

*Halomicrobium zhouii* TBN51T *rrn*B (HQ215546)

*Halomicrobium mukohataei* JCM9738T *rrn*A (EF645690)

*Halomicrobium mukohataei* JCM9738T *rrn*A (EF645690)

*Methanospirillum hungatei* JF-1T (NR_074177)

89

82

64

72

99

65

55

66

94

84

100

78

54

65

56

Fig. S2. Maximum-parsimony phylogenetic tree based on 16S rRNA gene sequence showing the relationships between strain YIM 93990T and closely related species. Bootstrap values (expressed as percentages of 1000 replications) greater than 50 % are shown at branch points. *Methanospirillum hungatei* JF-1T was used as an outgroup.

*Halosimplex carlsbadense* JCM 11222T (AB477192)

*Halosimplex pelagicum* R2T (KF434759)

*Halosimplex rubrum* R27T (KF434760)

*Halosimplex litoreum* YGH94T (KJ921126)

*Halosimplex halophilum* TH32T (MF458300)

*Halosimplex salinum* YPL4T (MH324936)

*Halosimplex aquaticum* XZYJT29T (OP751022)

*Halomicrobium urmianum* DC8T (KP276262)

*Halomicrobium salinisoli* LT50T (MF447867)

*Halomicrobium mukohataei* JCM 9738T (AB477172)

**YIM 93990T (PX270318)**

*Halomicrobium zhouii* TBN51T (JN120804)

*Methanospirillum hungatei* JF-1T (NC_007796)

100

100

66

70

91

100

69

73

97

64

0.05

Fig. S3. Neighbor-joining phylogenetic tree based on *rpoB'* gene sequence showing the relationships between strain YIM 93990T and closely related species. Bootstrap values (expressed as percentages of 1000 replications) greater than 50 % are shown at branch points. Bar, 0.05 substitutionsper nucleotide position. *Methanospirillum hungatei* JF-1T was used as an outgroup.

*Halosimplex pelagicum* R2T (KF434759)

*Halosimplex rubrum* R27T (KF434760)

*Halosimplex carlsbadense* JCM 11222T (AB477192)

*Halosimplex litoreum* YGH94T (KJ921126)

*Halosimplex halophilum* TH32T (MF458300)

*Halosimplex salinum* YPL4T (MH324936)

*Halosimplex aquaticum* XZYJT29T (OP751022)

*Halomicrobium urmianum* DC8T (KP276262)

*Halomicrobium salinisoli* LT50T (MF447867)

*Halomicrobium mukohataei* JCM 9738T (AB477172)

**YIM 93990T (PX270318)**

*Halomicrobium zhouii* TBN51T (JN120804)

*Methanospirillum hungatei* JF-1T (NC_007796)

100

98

68

64

62

90

78

90

0.05

Fig. S4. Maximum-likelihood tree based on *rpoB'* gene sequence showing the relationships between strain YIM 93990T and closely related species. Bootstrap values (expressed as percentages of 1000 replications) greater than 50 % are shown at branch points. Bar, 0.05 substitutionsper nucleotide position. *Methanospirillum hungatei* JF-1T was used as an outgroup.


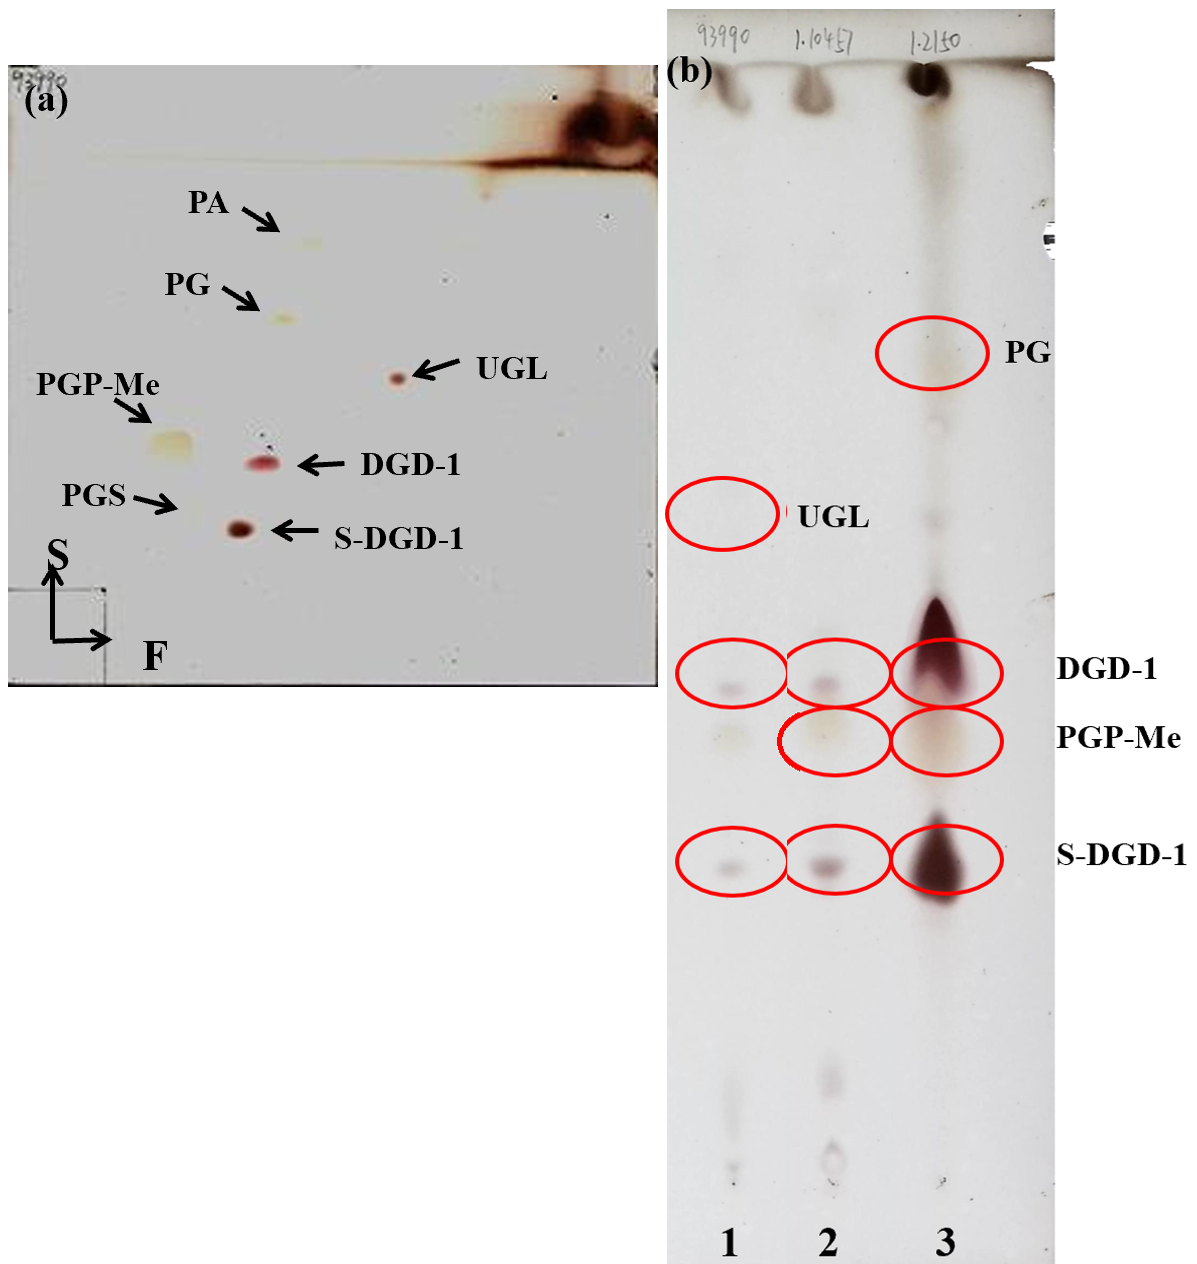


Fig. S5. Polar lipids profile of: 1) strain YIM 93990T, 2) Halomicrobium *zhouii* CGMCC 1.10457T, 3) *Haloferax volcanii* CGMCC 1.2150T. a) Two-dimensional thin-layer chromatography (TLC) with the conditions as follows: Silica Gel 60 thin-layer plates (10×10cm) were spotted with 10.0 μl of a whole-cell lipid extract. Chloroform/methanol/water (65:25:4, by vol) was used in the first direction, and chloroform/acetic acid/methanol/water (80:18:12:5, by vol) was used in the second direction. The plate was sprayed with phosphomolybdate reagent, followed by heating at 150 oC for 3 min to detect all polar lipids. b) Single-dimensional TLC with the exhibition layer agent chloroform/acetic acid/methanol/water (80:25:12:5, by vol). Abbreviation: Phosphatidic acid (PA), phosphatidylglycerol (PG), phosphatidylglycerol phosphate methyl ester (PGP-Me), phosphatidylglycerol sulfate (PGS), mannosyl glucosyl diether (DGD-1), sulfated mannosyl glucosyl diethers (S-DGD-1), and unidentified glycolipid (UGL).


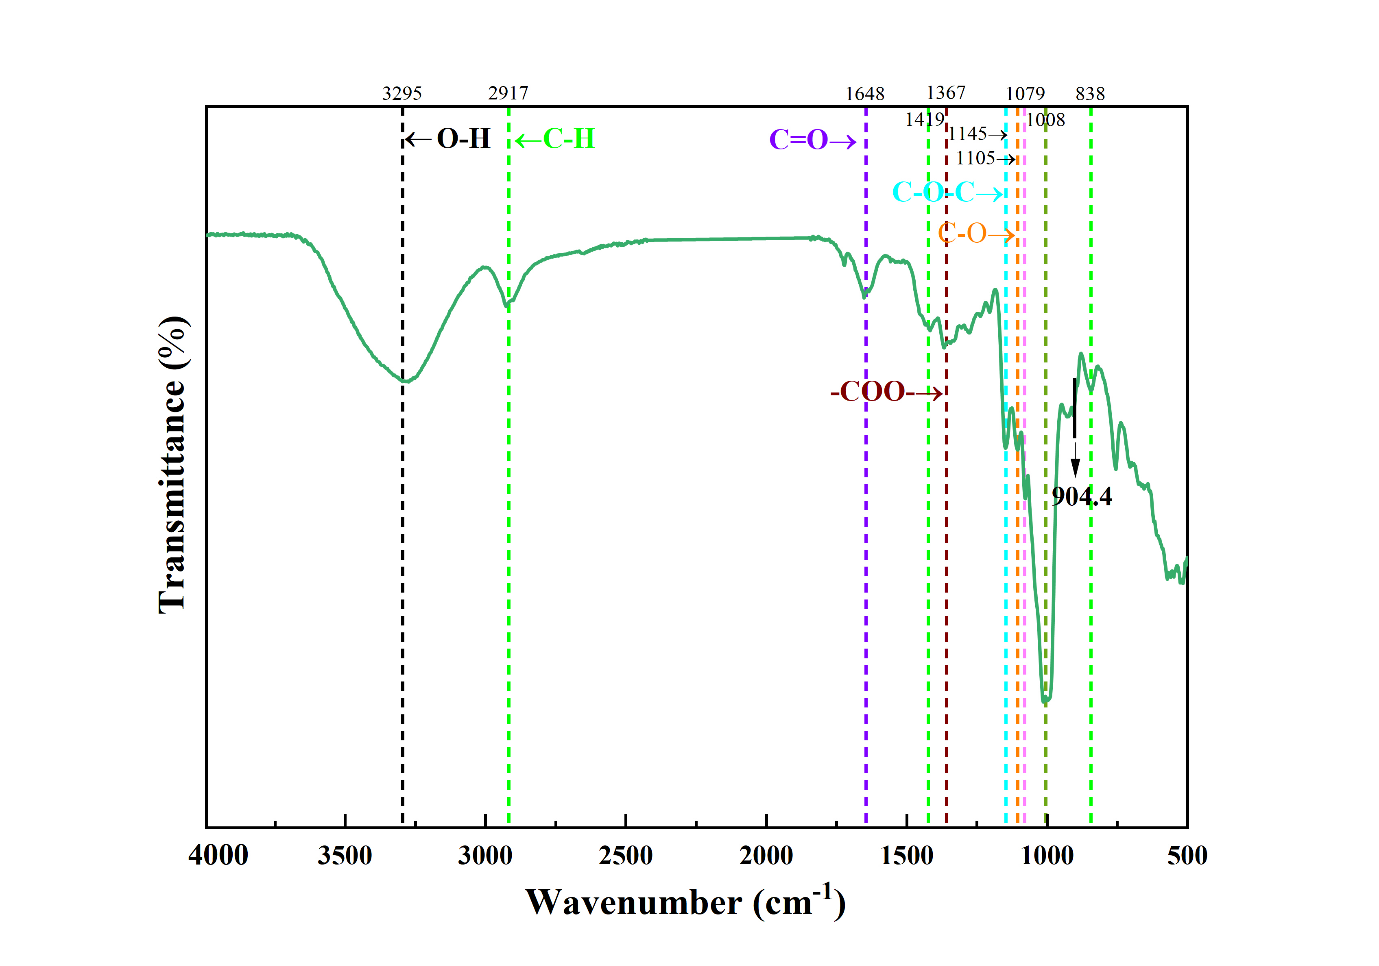


Fig. S6. Fourier transform infrared spectroscopy of strain YIM 93990T EPS.


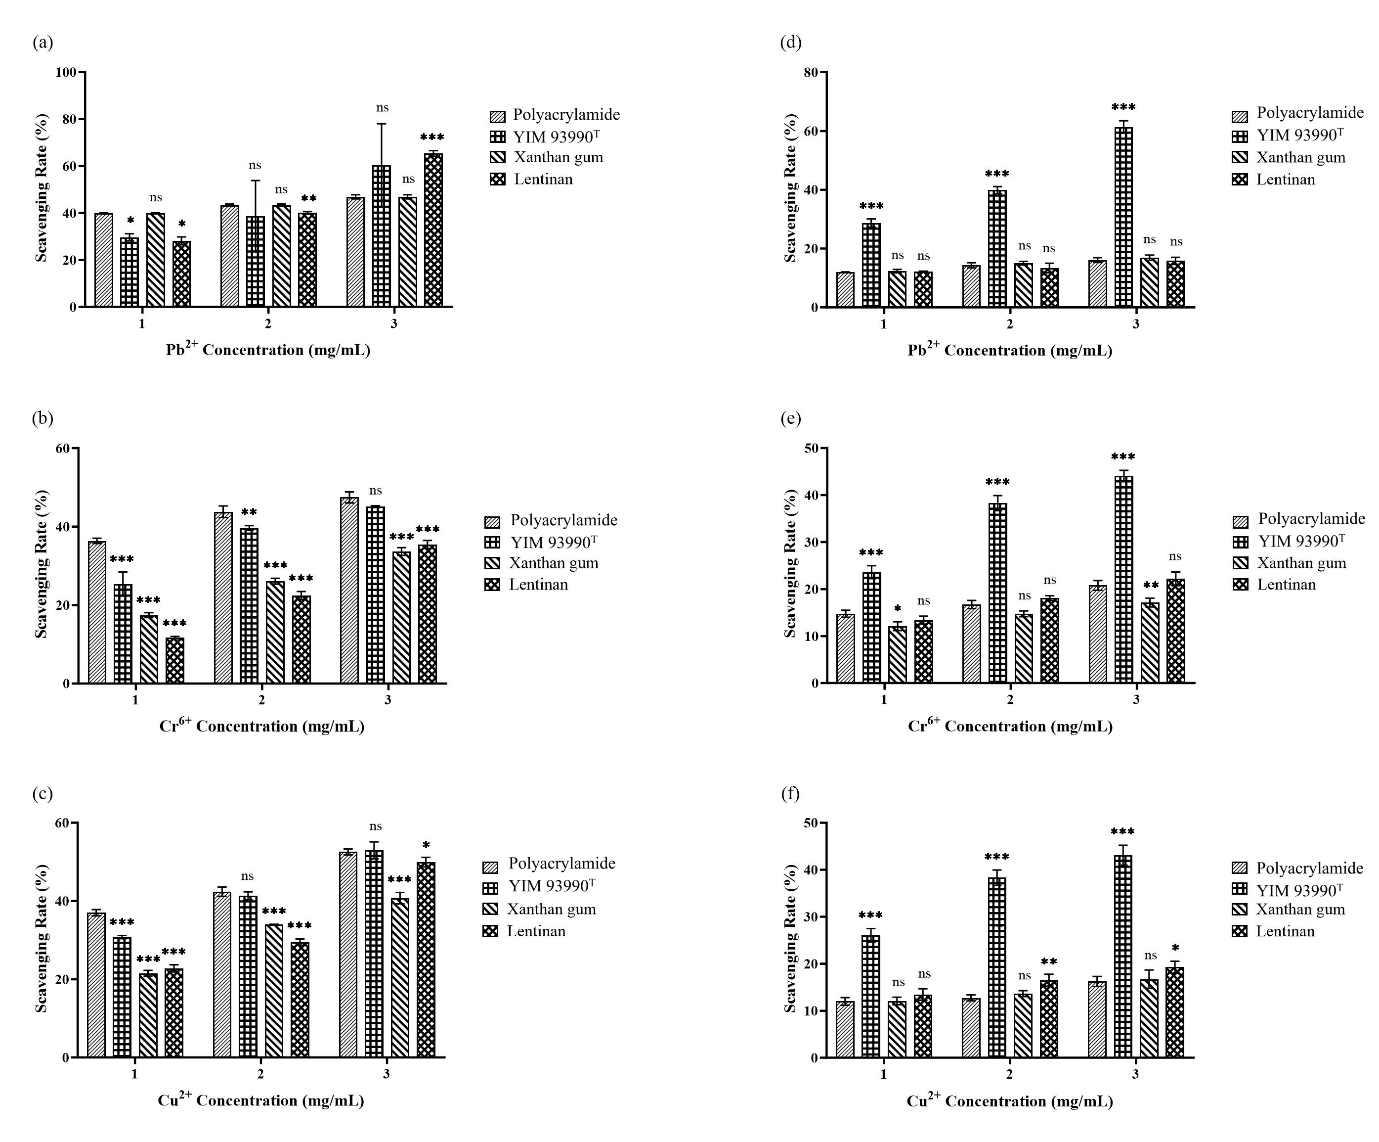


Fig. S7. Metal removal rates. 1) 1 mg/ml concentration, 2) 2 mg/ml concentration, 3) 3 mg/ml concentration.
